# Supplementary material
Source: PubMed Central journal article supplement (PMC7825875)
Supplement: mmc1.pdf [file mmc1.pdf]

# THE LANCET

## Respiratory Medicine

### Supplementary appendix 1

This translation in French was submitted by the authors and we reproduce it as supplied. It has not been peer reviewed. *The Lancet's* editorial processes have only been applied to the original in English, which should serve as reference for this manuscript.

Cette traduction en français a été proposée par les auteurs et nous l'avons reproduite telle quelle. Elle n'a pas été examinée par des pairs. Les processus éditoriaux du *Lancet* n'ont été appliqués qu'à l'original en anglais et c'est cette version qui doit servir de référence pour ce manuscrit.

Supplement to: The CORIMUNO-19 Collaborative group. Effect of anakinra versus usual care in adults in hospital with COVID-19 and mild-to-moderate pneumonia (CORIMUNO-ANA-1): a randomised controlled trial. *Lancet Respir Med* 2021; published online Jan 22. [http://dx.doi.org/10.1016/S2213-2600\(20\)30556-7](http://dx.doi.org/10.1016/S2213-2600(20)30556-7).

**Effet de l'Anakinra versus traitement usuel chez des patients adultes hospitalisés avec pneumonie COVID-19, moyenne ou modérée (CORIMUNO-ANA-1) : Résultats d'un essai contrôlé randomisé.**

**Groupe collaboratif CORIMUNO-19.**

**Rationnel**

Les patients avec une pneumonie COVID-19 ont un état hyper inflammatoire et une augmentation des cytokines pro-inflammatoires incluant l'Interleukine-1 (IL-1). Nous avons évalué l'effet de l'Anakinra, un antagoniste du récepteur de l'IL-1 chez des patients hospitalisés avec une pneumonie COVID-19 moyenne à modérée.

**Méthodes**

Dans cet essai clinique randomisé, ouvert, multicentrique, utilisant une analyse Bayésienne (CORIMUNO-ANA-1) niché dans la cohorte CORIMUNO-19, nous avons recruté des patients avec pneumonie COVID-19 modérée à sévère et des symptômes respiratoires (diagnostic confirmé par RT-PCR ou scanner pulmonaire) venant de 16 centres hospitaliers Français. Les patients devaient nécessiter au moins 3 litres par minute d'oxygène au masque ou canule nasale mais sans recours à une assistance ventilatoire (score de 5 sur l'échelle de progression clinique de l'OMS) et devaient avoir une concentration de la protéine C réactive supérieure à 25 mg/l. Les patients en réanimation sous ventilation non invasive ou mécanique étaient exclus de l'essai.

Les patients éligibles ont été randomisés (1:1) par un système centralisé stratifié par centre avec des tailles de blocs variant de 2 à 4 au hasard en deux groupes : soit traitement usuel plus anakinra (200 mg par voie intraveineuse deux fois par jour, J1 à J3 ; 100 mg deux fois par jour à J4 ; 100 mg une fois par jour à J5) soit traitement usuel seul. Le traitement usuel était décidé par les cliniciens de chaque site. Les deux critères principaux conjoints étaient la proportion de patients morts ou nécessitant une ventilation non invasive ou mécanique à J4 (c'est-à-dire un score OMS > 5) et la survie sans ventilation mécanique ou non invasive (incluant l'oxygène à haut débit) à J14. Toutes les analyses ont été faites en intention de traiter. L'essai est enregistré sur ClinicalTrials.gov, NCT04341584 et est maintenant terminé.

**Résultats**

Entre le 8 avril et 26 avril 2020, 153 patients ont été screenés. L'essai a été terminé de façon prématurée suivant les recommandations du Comité de Surveillance après le recrutement de 116 patients : 59 randomisés dans le groupe anakinra et 57 randomisés dans le groupe traitement usuel. Deux patients du groupe traitement usuel ont retiré leur consentement et n'ont pas été analysés. Dans la population analysable, l'âge médian était de 66 ans (IQR 59-76) et 80 (70%) des patients étaient des hommes.

Dans le groupe anakinra, 21 (36%) des 59 patients avaient un score OMS supérieur à 5 à J4, versus 21 (38%) des 55 patients du groupe traitement usuel (médiane à postériori de la différence de risque: -2,5%, intervalle de crédibilité [ICr] à 90 %: -17,1 ; +12,0), avec une probabilité à postériori que la différence de risque soit < 0 (anakinra plus efficace que le traitement usuel) de 61,2%.

A J14, 28 (47 % ; IC95 % 33 ; 59) patients dans le groupe anakinra et 28 (51% ; IC95 % CI 36 ; 62) patients dans le groupe traitement usuel ont eu recours à la ventilation ou sont morts avec une probabilité à postériori d'efficacité de l'anakinra (Hazard Ratio [HR] < 1 de 54,5% (HR médian à postériori 0,97, ICr 90 %, 0,62 ; 1,52). A J90, 16 (27%) patients dans le groupe anakinra et 15 (25%) patients dans le groupe traitement usuel étaient morts. Des événements indésirables graves sont apparus chez 27 (46%) patients dans le groupe anakinra et 21 (38 %) dans le groupe traitement usuel (p=0,45).

**Interprétation**

L'anakinra n'a pas amélioré l'évolution des patients avec pneumonie COVID-19 moyenne à modérée. Des études ultérieures sont nécessaires pour étudier l'efficacité de l'anakinra dans d'autres groupes de patients sélectionnés avec une infection COVID-19 plus sévère.

**Financement**

Ministre de la Santé, programme hospitalier de recherche clinique, Fondation pour la Recherche Médicale et Fondation AP-HP.
